# Supplementary material for: Urine NGAL as a biomarker for septic AKI: a critical appraisal of clinical utility—data from the observational FINNAKI study
Source: Ann Intensive Care. 2020 Apr 28;10:51. doi: 10.1186/s13613-020-00667-7 (PMC7188747; doi:10.1186/s13613-020-00667-7)
Supplement: Supplementary file 2 — Additional file 2: Correlations between the variables and multicollinearity test results. [file 13613_2020_667_MOESM2_ESM.xlsx]

## Sheet: Taul1
Correlations
			Ikä	ANY_DIABETES	KRMUN	LIVER_DISEASE	SYST	CHORTICOSTEROID_KL	PRE_HYPOVOLEMIA	PRE_DIUREETTI	PRE_HYPOTENSIO	NON_OPERATIVE	0=ESmissing	SAPS_wo_age_and_renal_080113	Highest_LACTATE_onICUADM_DAY	ACUTE_LIVER
Spearman's rho	Ikä	Correlation Coefficient	1	,134**	,133**	-,136**	,263**	,170**	-0.00447488	,280**	0.0778038	-0.0427572	0.0036893	0.00999764	0.0510691	-0.0750272
		Sig. (2-tailed)		0.00319531	0.00331043	0.00280493	4.15575e-09	0.000179144	0.921779	3.56764e-10	0.0872934	0.347908	0.935478	0.82635	0.26214	0.0992183
		N	484	484	484	484	484	484	484	484	484	484	484	484	484	484
	ANY_DIABETES	Correlation Coefficient	,134**	1	,140**	0.00440921	,136**	-0.0314796	-0.0139408	,219**	0.0165487	0.0857211	0.0363707	-0.0189424	-0.0077088	-0.0731286
		Sig. (2-tailed)	0.00319531		0.00194981	0.922923	0.00276518	0.489608	0.759666	1.11724e-06	0.71649	0.0595031	0.424667	0.677635	0.865673	0.108093
		N	484	484	484	484	484	484	484	484	484	484	484	484	484	484
	KRMUN	Correlation Coefficient	,133**	,140**	1	0.00971781	,150**	,180**	0.0508045	,178**	,099*	0.0163917	0.0179847	-0.0890777	0.030353	-0.00389937
		Sig. (2-tailed)	0.00331043	0.00194981		0.831137	0.000928369	6.97575e-05	0.264624	7.86281e-05	0.0287758	0.719064	0.693085	0.0501669	0.505288	0.931812
		N	484	484	484	484	484	484	484	484	484	484	484	484	484	484
	LIVER_DISEASE	Correlation Coefficient	-,136**	0.00440921	0.00971781	1	-,089*	-0.020486	,107*	-0.0201353	0.0744561	0.00216796	0.0147136	,105*	,114*	,399**
		Sig. (2-tailed)	0.00280493	0.922923	0.831137		0.0499428	0.653017	0.0189879	0.658579	0.101825	0.962058	0.746787	0.0205549	0.0119506	7.15638e-20
		N	484	484	484	484	484	484	484	484	484	484	484	484	484	484
	SYST	Correlation Coefficient	,263**	,136**	,150**	-,089*	1	0.0553975	-0.00484285	,314**	0.0246006	0.0317241	0.0251453	0.00886874	0.0343089	-0.0346147
		Sig. (2-tailed)	4.15575e-09	0.00276518	0.000928369	0.0499428		0.223784	0.91537	1.56168e-12	0.589269	0.48624	0.581049	0.845697	0.45141	0.447385
		N	484	484	484	484	484	484	484	484	484	484	484	484	484	484
	CHORTICOSTEROID_KL	Correlation Coefficient	,170**	-0.0314796	,180**	-0.020486	0.0553975	1	0.00776041	,145**	0.0741003	0.0711933	0.0228273	-0.0610367	-0.0169611	0.0123621
		Sig. (2-tailed)	0.000179144	0.489608	6.97575e-05	0.653017	0.223784		0.864782	0.00139293	0.103476	0.117774	0.616394	0.180055	0.709739	0.78618
		N	484	484	484	484	484	484	484	484	484	484	484	484	484	484
	PRE_HYPOVOLEMIA	Correlation Coefficient	-0.00447488	-0.0139408	0.0508045	,107*	-0.00484285	0.00776041	1	0.00698957	,398**	-0.0602077	-0.0136025	0.0343196	,261**	,099*
		Sig. (2-tailed)	0.921779	0.759666	0.264624	0.0189879	0.91537	0.864782		0.878103	8.85675e-20	0.186054	0.765325	0.451269	5.49909e-09	0.0299378
		N	484	484	484	484	484	484	484	484	484	484	484	484	484	484
	PRE_DIUREETTI	Correlation Coefficient	,280**	,219**	,178**	-0.0201353	,314**	,145**	0.00698957	1	,101*	0.0808468	-0.0164856	-,134**	-0.0690848	0.00884867
		Sig. (2-tailed)	3.56764e-10	1.11724e-06	7.86281e-05	0.658579	1.56168e-12	0.00139293	0.878103		0.0270204	0.0755781	0.717525	0.00309822	0.129077	0.846042
		N	484	484	484	484	484	484	484	484	484	484	484	484	484	484
	PRE_HYPOTENSIO	Correlation Coefficient	0.0778038	0.0165487	,099*	0.0744561	0.0246006	0.0741003	,398**	,101*	1	0.0343416	-0.0209974	0.0817654	,261**	,096*
		Sig. (2-tailed)	0.0872934	0.71649	0.0287758	0.101825	0.589269	0.103476	8.85675e-20	0.0270204		0.450979	0.644943	0.0723041	5.26701e-09	0.0348981
		N	484	484	484	484	484	484	484	484	484	484	484	484	484	484
	NON_OPERATIVE	Correlation Coefficient	-0.0427572	0.0857211	0.0163917	0.00216796	0.0317241	0.0711933	-0.0602077	0.0808468	0.0343416	1	-0.0376002	,090*	-0.0104766	0.0770052
		Sig. (2-tailed)	0.347908	0.0595031	0.719064	0.962058	0.48624	0.117774	0.186054	0.0755781	0.450979		0.409168	0.0470468	0.818172	0.0905989
		N	484	484	484	484	484	484	484	484	484	484	484	484	484	484
	0=ESmissing	Correlation Coefficient	0.0036893	0.0363707	0.0179847	0.0147136	0.0251453	0.0228273	-0.0136025	-0.0164856	-0.0209974	-0.0376002	1	-0.0131497	-0.0159549	0.01152
		Sig. (2-tailed)	0.935478	0.424667	0.693085	0.746787	0.581049	0.616394	0.765325	0.717525	0.644943	0.409168		0.772919	0.726247	0.800429
		N	484	484	484	484	484	484	484	484	484	484	484	484	484	484
	SAPS_wo_age_and_renal_080113	Correlation Coefficient	0.00999764	-0.0189424	-0.0890777	,105*	0.00886874	-0.0610367	0.0343196	-,134**	0.0817654	,090*	-0.0131497	1	,266**	,104*
		Sig. (2-tailed)	0.82635	0.677635	0.0501669	0.0205549	0.845697	0.180055	0.451269	0.00309822	0.0723041	0.0470468	0.772919		2.87033e-09	0.0227691
		N	484	484	484	484	484	484	484	484	484	484	484	484	484	484
	Highest_LACTATE_onICUADM_DAY	Correlation Coefficient	0.0510691	-0.0077088	0.030353	,114*	0.0343089	-0.0169611	,261**	-0.0690848	,261**	-0.0104766	-0.0159549	,266**	1	,140**
		Sig. (2-tailed)	0.26214	0.865673	0.505288	0.0119506	0.45141	0.709739	5.49909e-09	0.129077	5.26701e-09	0.818172	0.726247	2.87033e-09		0.00197021
		N	484	484	484	484	484	484	484	484	484	484	484	484	484	484
	ACUTE_LIVER	Correlation Coefficient	-0.0750272	-0.0731286	-0.00389937	,399**	-0.0346147	0.0123621	,099*	0.00884867	,096*	0.0770052	0.01152	,104*	,140**	1
		Sig. (2-tailed)	0.0992183	0.108093	0.931812	7.15638e-20	0.447385	0.78618	0.0299378	0.846042	0.0348981	0.0905989	0.800429	0.0227691	0.00197021
		N	484	484	484	484	484	484	484	484	484	484	484	484	484	484
**. Correlation is significant at the 0.01 level (2-tailed).
*. Correlation is significant at the 0.05 level (2-tailed).

## Sheet: Taul2
Coefficientsa
Model		Unstandardized Coefficients		Standardized Coefficients	t	Sig.	95,0% Confidence Interval for B		Correlations			Collinearity Statistics
		B	Std. Error	Beta			Lower Bound	Upper Bound	Zero-order	Partial	Part	Tolerance	VIF
1	(Constant)	0.1846	0.123926		1.4896	0.137012	-0.0589285	0.428129
	Ikä	0.00306515	0.00150683	0.100982	2.03417	0.0425053	0.000104057	0.00602625	0.112708	0.0942171	0.087791	0.755812	1.32308
	GENDER_MALE	-0.0307411	0.046267	-0.0296613	-0.664429	0.506748	-0.121661	0.0601787	-0.0258659	-0.0308973	-0.0286755	0.934637	1.06993
	ANY_DIABETES	0.0296137	0.0555512	0.0254937	0.533088	0.594229	-0.0795506	0.138778	0.0246801	0.0247939	0.0230071	0.814439	1.22784
	KRMUN	0.171649	0.0880678	0.0893949	1.94905	0.051894	-0.00141434	0.344712	0.117217	0.0903076	0.0841175	0.885417	1.12941
	COPD	-0.134004	0.0725649	-0.0827296	-1.84668	0.0654333	-0.276602	0.00859425	-0.065838	-0.0855998	-0.0796992	0.928081	1.07749
	LIVER_DISEASE	-0.243952	0.111227	-0.106489	-2.19329	0.0287843	-0.462525	-0.0253793	-0.0336876	-0.101514	-0.0946583	0.790152	1.26558
	SYST	-0.0903339	0.0693991	-0.061529	-1.30166	0.193682	-0.226711	0.0460432	-0.00851411	-0.0604479	-0.0561771	0.833603	1.19961
	RR_TAUTI	-0.0239347	0.0547944	-0.0240287	-0.436809	0.662454	-0.131612	0.0837425	-0.0276963	-0.020318	-0.0188519	0.615529	1.62462
	ASO	0.0640196	0.0682099	0.0436056	0.938567	0.348443	-0.0700205	0.19806	0.0650721	0.0436245	0.0405068	0.862924	1.15885
	ACE_ARB	-0.0967105	0.0565707	-0.0924434	-1.70955	0.0880207	-0.207878	0.0144574	-0.0513338	-0.0792851	-0.073781	0.636997	1.56987
	NSAID_KL	0.0801782	0.0711937	0.0494994	1.1262	0.260667	-0.0597254	0.220082	0.0559413	0.0523237	0.0486046	0.964174	1.03716
	CHORTICOSTEROID_KL	-0.00937495	0.0734747	-0.00593492	-0.127594	0.898526	-0.153761	0.135011	0.0368059	-0.00593612	-0.00550673	0.860912	1.16156
	PRE_HYPOVOLEMIA	0.122943	0.0501677	0.120938	2.45065	0.0146296	0.0243583	0.221529	0.211602	0.113281	0.105766	0.764829	1.30748
	PRE_DIUREETTI	0.0957146	0.0507049	0.0932249	1.88768	0.0596956	-0.00392626	0.195356	0.0977816	0.087486	0.0814687	0.763691	1.30943
	PRE_COLLOID	-0.00961978	0.0559324	-0.00887799	-0.171989	0.863521	-0.119533	0.100294	0.0773126	-0.00800142	-0.00742275	0.699037	1.43054
	PRE_HYPOTENSIO	0.133742	0.0519764	0.127841	2.57314	0.0103891	0.0316029	0.235882	0.228321	0.118864	0.111052	0.754585	1.32523
	NON_OPERATIVE	-0.0954918	0.0738536	-0.0835962	-1.29299	0.196661	-0.240622	0.0496388	-0.0176848	-0.0600467	-0.055803	0.445596	2.24419
	EMERGENCY_SURGERY	-0.0787961	0.0767261	-0.06803	-1.02698	0.304968	-0.229572	0.0719793	-0.0184316	-0.0477249	-0.0443225	0.42447	2.35588
	SAPS_wo_age_and_renal_080113	0.00161458	0.00187709	0.0394276	0.86015	0.390152	-0.00207412	0.00530328	0.0639402	0.0399858	0.0371225	0.886489	1.12805
	Highest_LACTATE_onICUADM_DAY	0.019151	0.00847931	0.108983	2.25855	0.0243769	0.00248816	0.0358138	0.197223	0.104502	0.0974749	0.799953	1.25007
	ACUTE_LIVER	0.215562	0.138398	0.0751135	1.55754	0.120026	-0.0564068	0.48753	0.0785076	0.072274	0.0672207	0.800886	1.24862
a. Dependent Variable: KDIGO_AKI_OBSERVATION3DAYS
